# Supplementary material
Source: publisher site journal article supplement (https://www.dovepress.com/article/533622)
Supplement: Supplementary file 1 [file Supporting%20information.docx]

*Supporting information:*


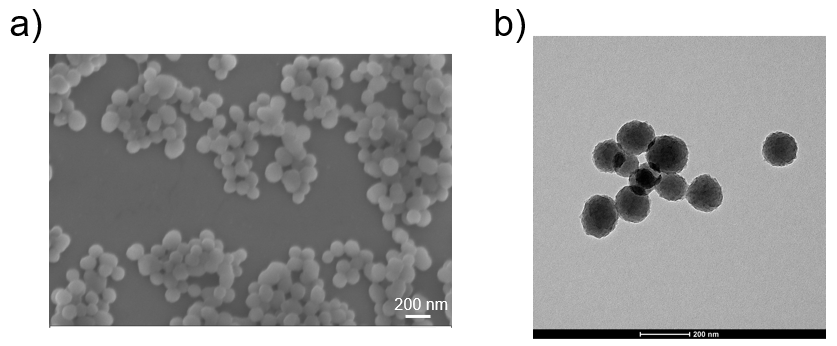


**Figure S1.** a) SEM and b) TEM images of PDA.


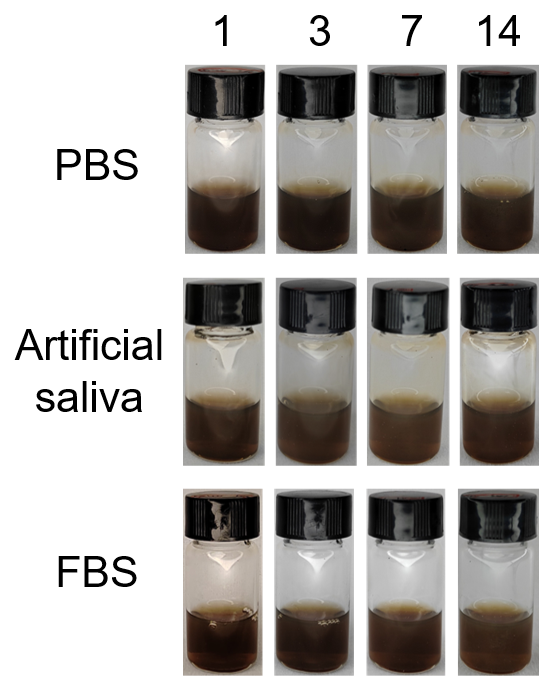


**Figure S2.** The photographs of PDA dispersed at PBS, artificial saliva and FBS for 14 days to observe stability.


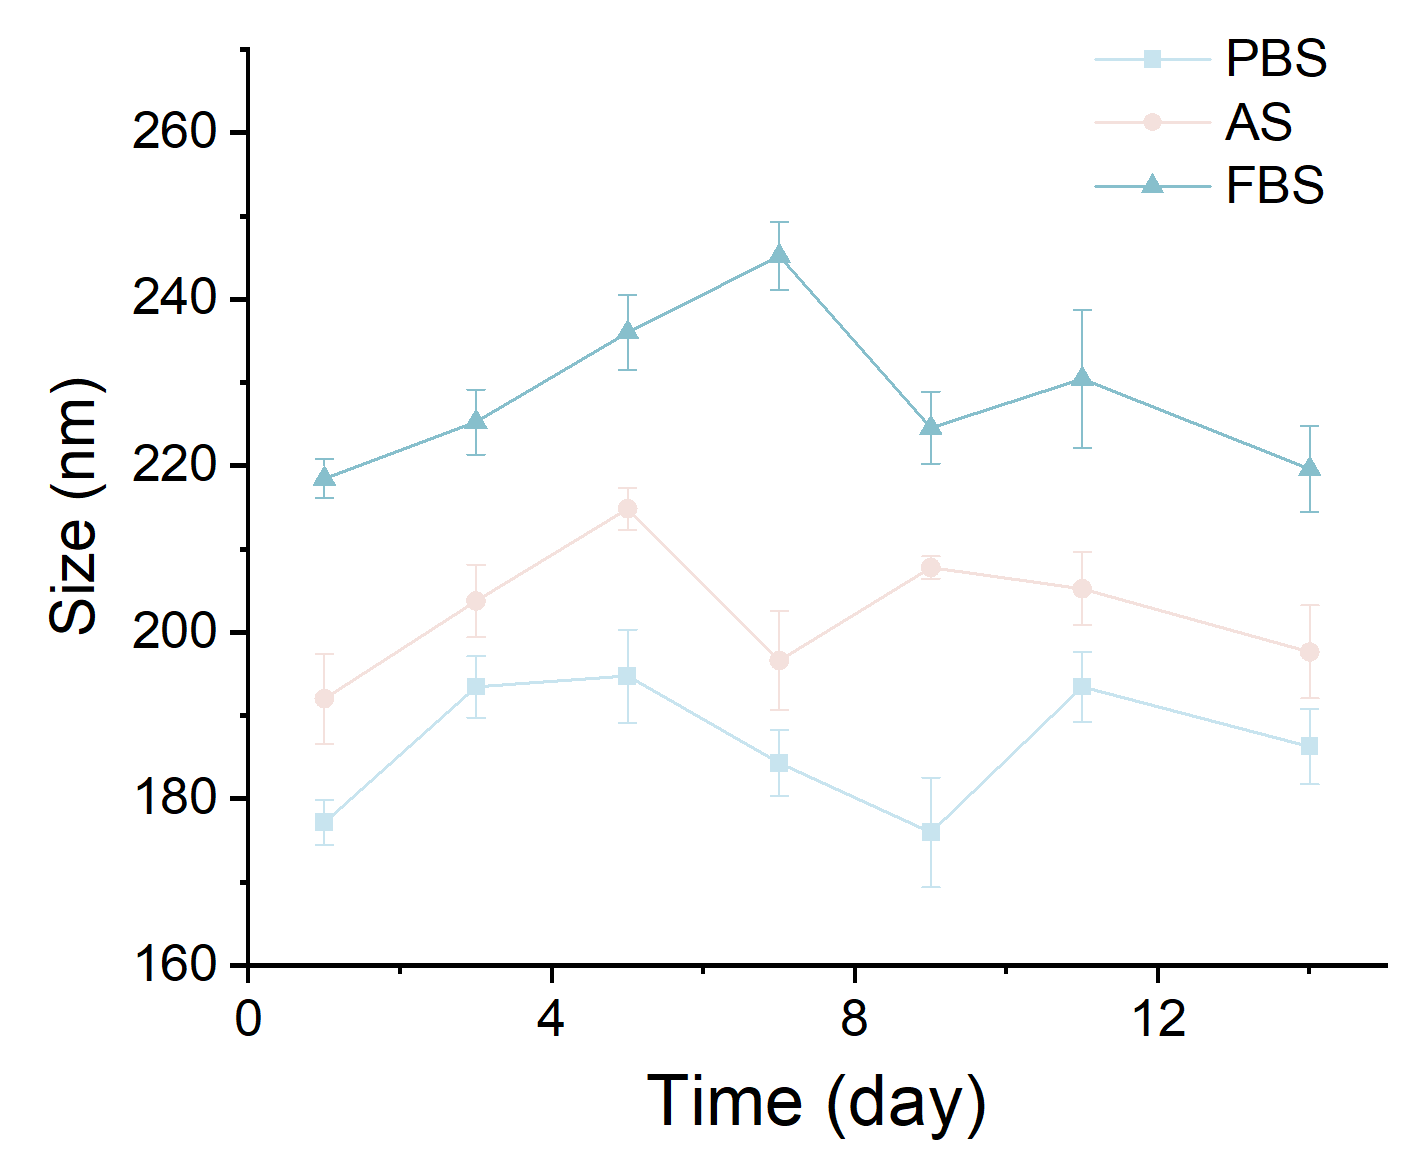


**Figure S3.** The size changes of PDA dispersed at PBS, artificial saliva and FBS for 14 days.


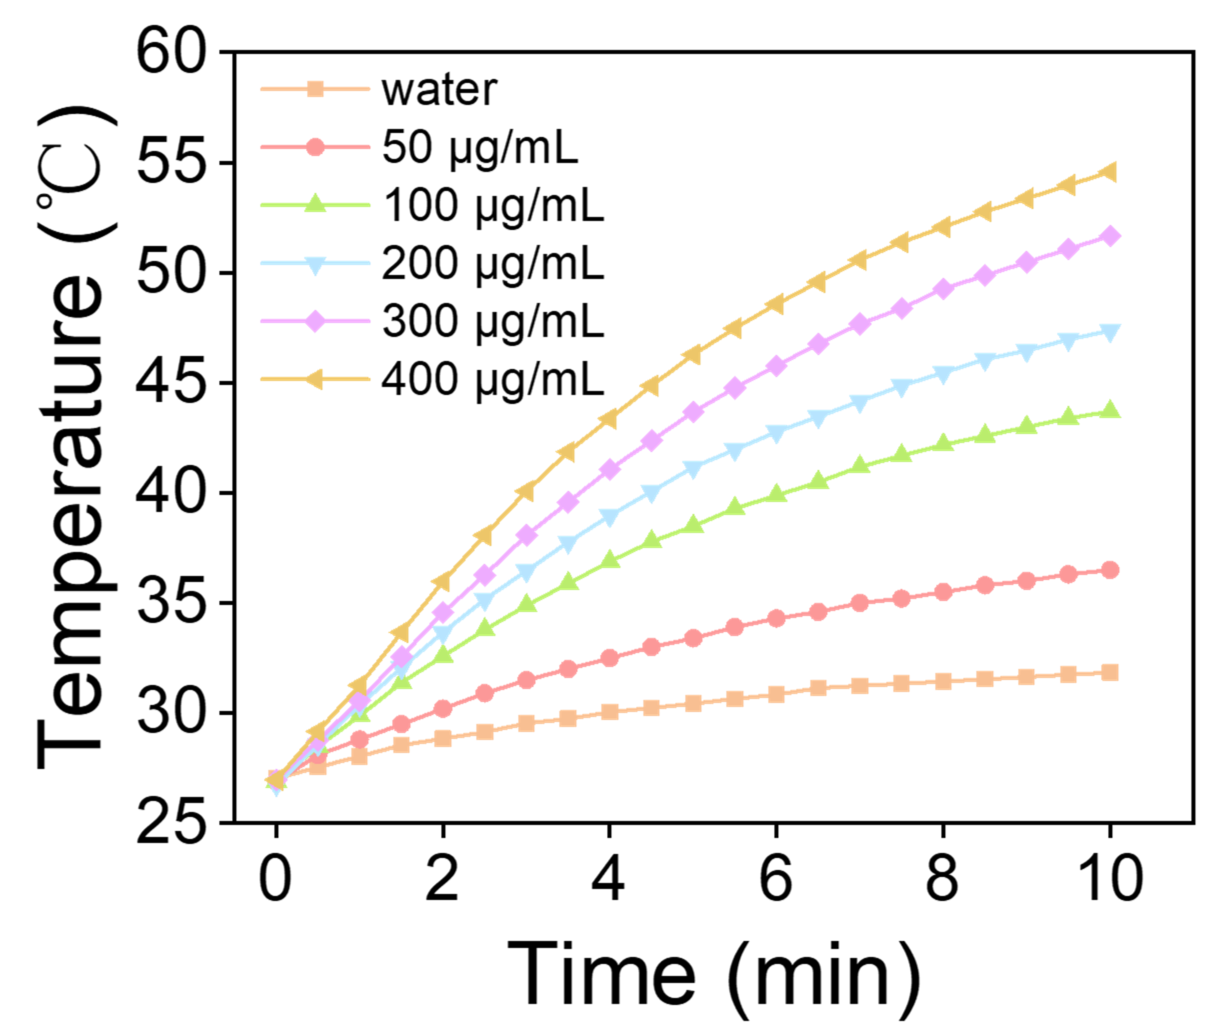


**Figure S4.** The temperature variation of PDA with different concentration at the irradiation of 808-nm laser with 1.5 W cm-1 for 10 min.


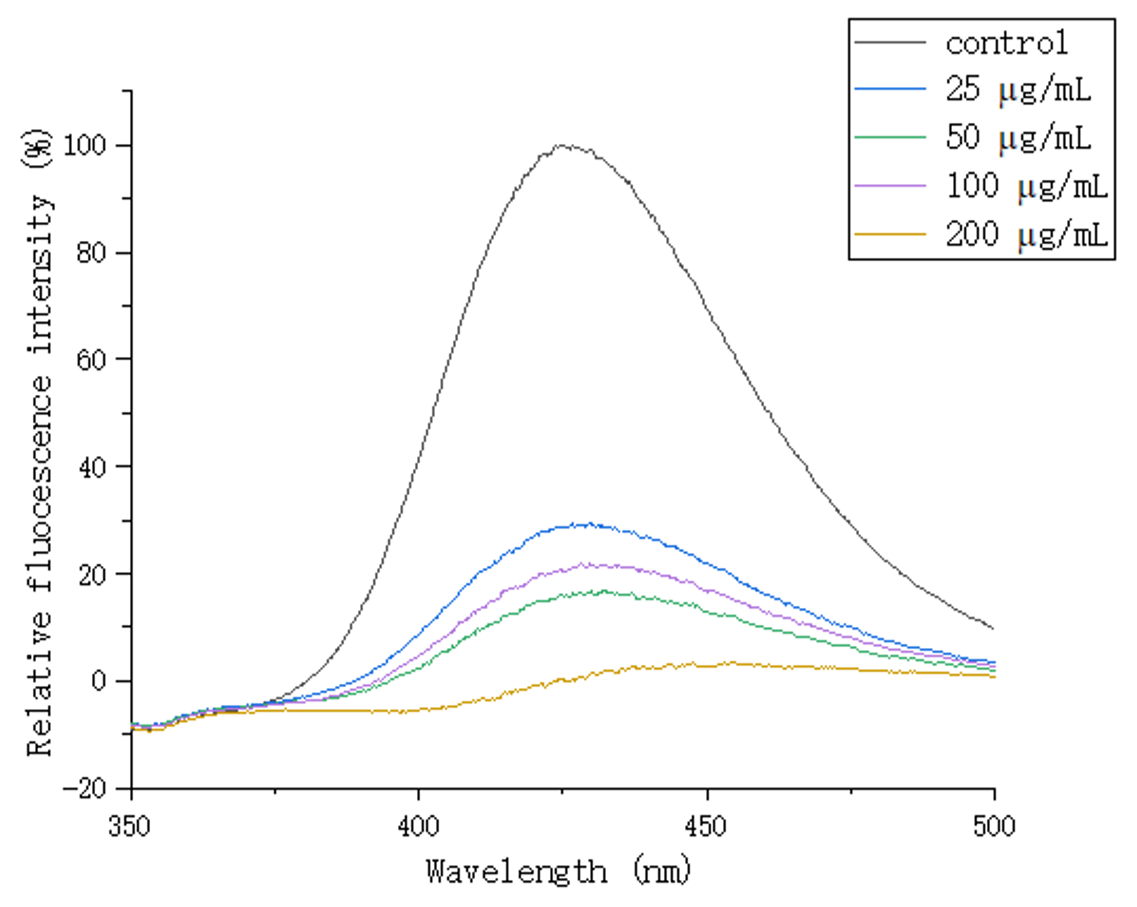


**Figure S5.**·The relative fluorescence spectrum of oxTA after eliminating ·OH by PDA at various concentration.


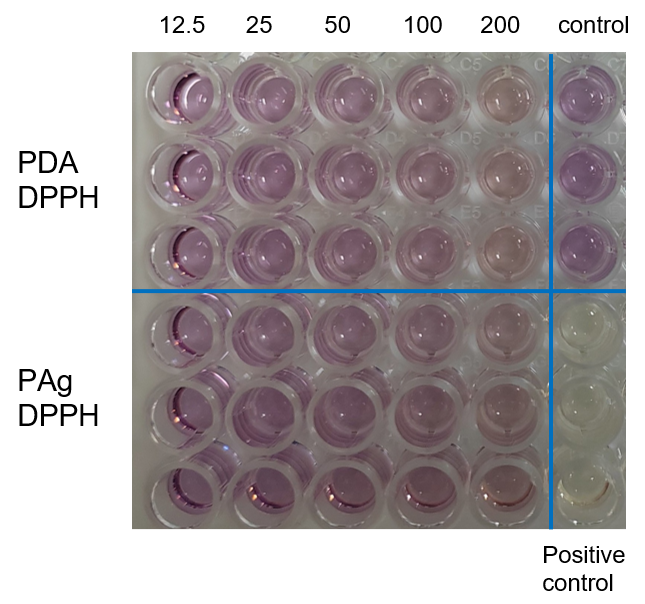


**Figure S6.** The photograph showing the color of the reaction for 30 min with PDA and PAg at various concentration.


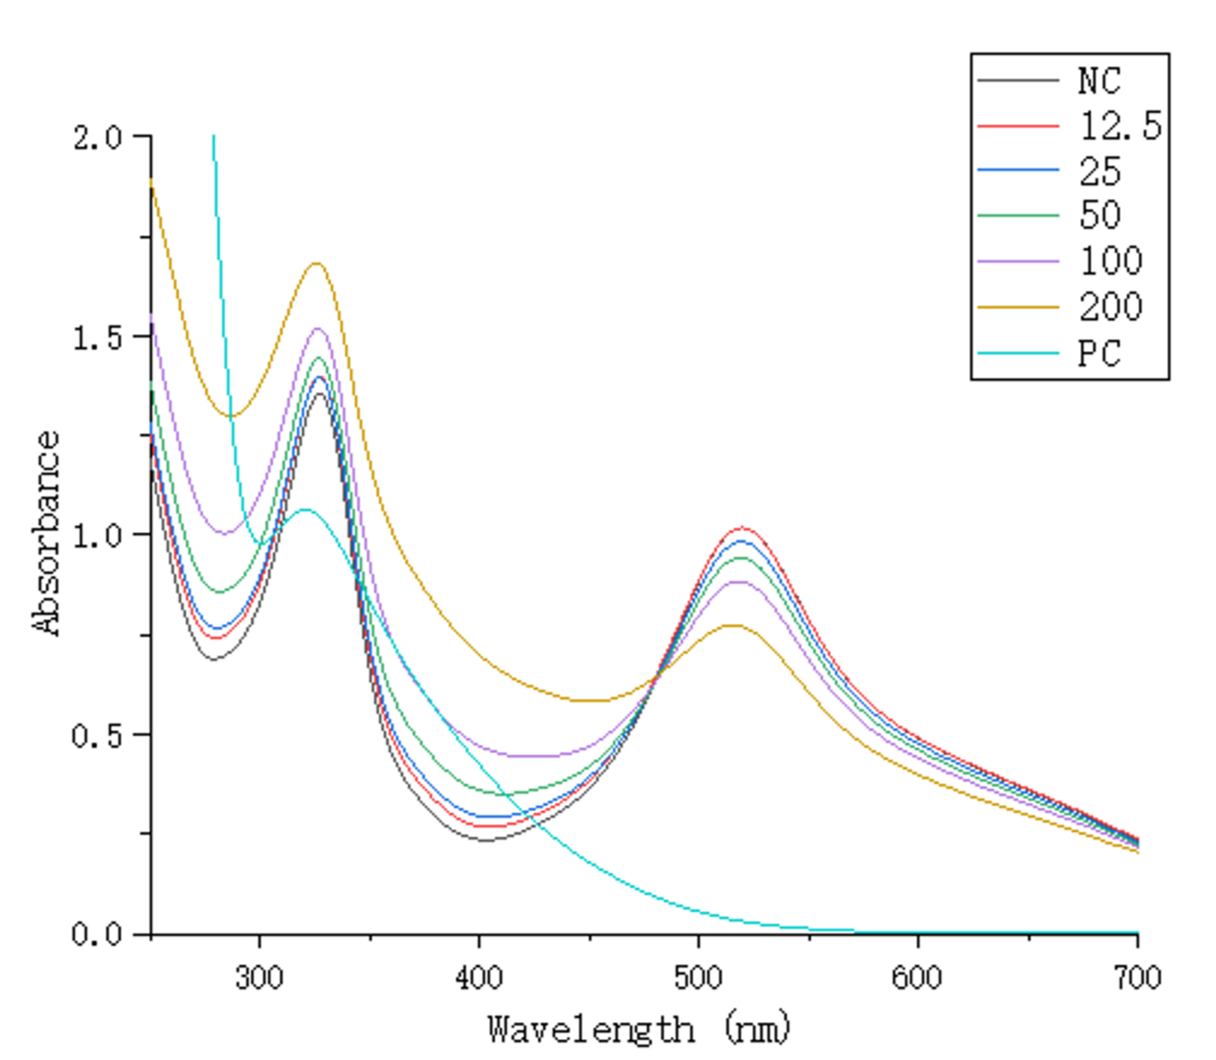


**Figure S7.** The absorbance spectrum of DPPH after treating with PDA at various concentration.


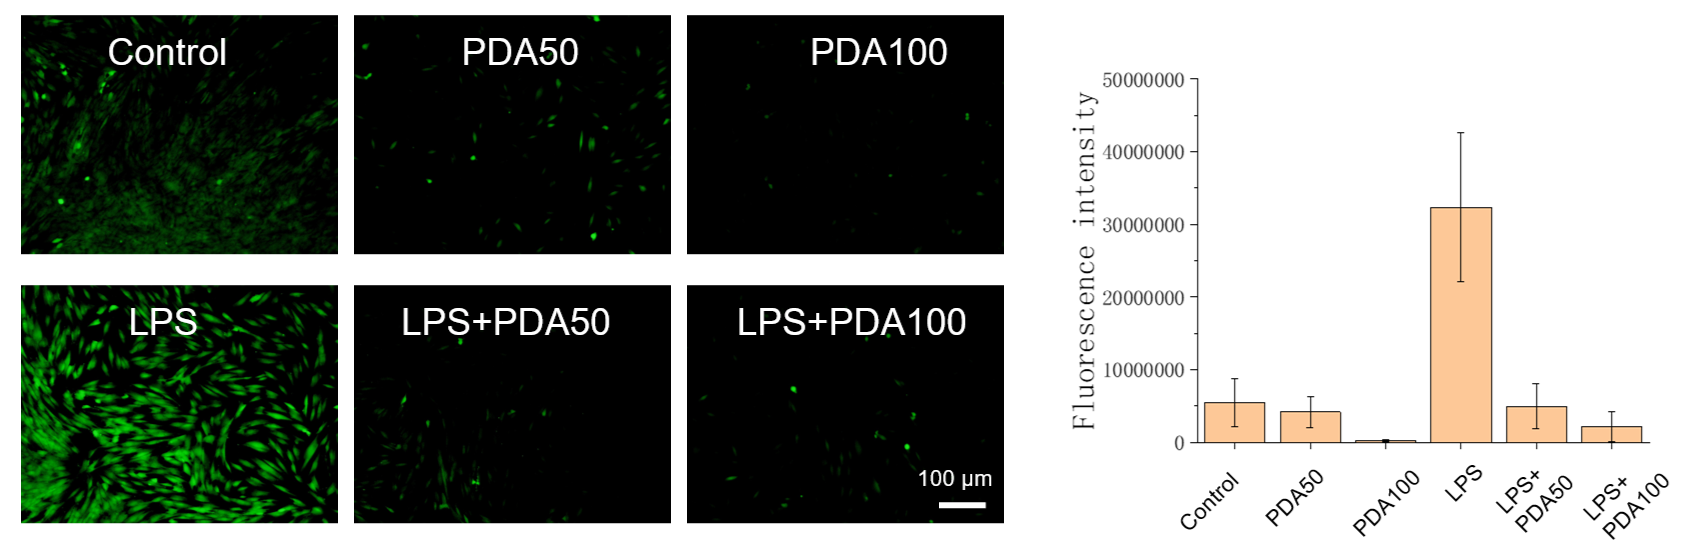


**Figure S8.** The fluorescence images and intensity of HPLCs after different treatments.

**Figure S9.** The body weight variation of rats in the course of treatments.
